# Supplementary material for: 1H NMR-Based Metabolomics Reveals the Intrinsic Interaction of Age, Plasma Signature Metabolites, and Nutrient Intake in the Longevity Population in Guangxi, China
Source: MDPI journal article supplement (doi:10.3390/nu14122539), 2022-06-18
Supplement: s1 [file s1]

**Table S1.** Assignments of plasma metabolites

| Number | Metabolites                 | Assignment                                                    | $\delta$ $^1\text{H}$ (ppm) and multiplicity* |
|--------|-----------------------------|---------------------------------------------------------------|-----------------------------------------------|
| 1      | Lipids(mainly VLDL)         | $\text{CH}_3$ , $(\text{CH}_2)_n$                             | 0.88(t), 1.29(m)                              |
| 2      | Isoleucine                  | $\delta\text{CH}_3$ , $\beta\text{CH}_3$ ,                    | 0.94(t), 1.01(d)                              |
| 3      | Proline                     | $\gamma\text{CH}_2$                                           | 1.99(m)                                       |
| 4      | Leucine                     | $\delta\text{CH}_3$ , $\beta\text{CH}_3$                      | 0.95(d), 0.96(d)                              |
| 5      | Valine                      | $\gamma\text{CH}_3$ , $\gamma\text{CH}_3$ , $\alpha\text{CH}$ | 0.99(d), 1.03(d), 3.60(d)                     |
| 6      | Lactate                     | $\beta\text{CH}_3$ , $\alpha\text{CH}$                        | 1.32(d), 4.11(q)                              |
| 7      | Alanine                     | $\beta\text{CH}_3$ , $\alpha\text{CH}$                        | 1.47(d), 3.78(q)                              |
| 8      | Acetic Acid                 | $\gamma\text{CH}_3$                                           | 1.91(s)                                       |
| 9      | N-acetyl glycoprotein (NAG) | $\text{CH}_3$                                                 | 2.03(s)                                       |
| 10     | Glutamic Acid               | $\beta\text{CH}_2$ , $\gamma\text{CH}_2$                      | 2.10(m), 2.34(m)                              |
| 11     | Glutamine                   | $\beta\text{CH}_2$ , $\gamma\text{CH}_2$                      | 2.12(m), 2.43(m)                              |
| 12     | Propanone                   | $\text{CH}_3$                                                 | 2.22(s)                                       |
| 13     | Acetoacetic Acid            | $\text{CH}_3$                                                 | 2.27(s)                                       |
| 14     | Pyranic Acid                | $\text{CH}_3$                                                 | 2.37(s)                                       |
| 15     | Succinic Acid               | $\text{CH}_2$                                                 | 2.41(s)                                       |
| 16     | Citrate                     | $\text{CH}_2(1/2)$ , $\text{CH}_2(1/2)$                       | 2.53(d), 2.69(d)                              |
| 17     | Trimethylamine              | $\text{CH}_3$                                                 | 2.86(s)                                       |
| 18     | Lysine                      | $\beta\text{CH}$                                              | 3.03(m)                                       |
| 19     | Choline                     | $\text{N}(\text{CH}_3)_3$ , $\text{N}-\text{CH}_2$            | 3.20(s), 3.66(m)                              |
| 20     | Carnitine                   | $\text{CH}_2(\text{COO})$                                     | 3.21(s)                                       |
| 21     | Phosphorylcholine           | $\text{N}(\text{CH}_3)_3$                                     | 3.22(s)                                       |
| 22     | Trimethylamine oxide (TMAO) | $\text{N}-(\text{CH}_3)_3$                                    | 3.26(s)                                       |
| 23     | Scyllitol                   | $\text{CH}$                                                   | 3.35(s)                                       |
| 24     | $\beta$ -Glucose            | $\text{C}-\text{H}_2$ , $\text{H}_3/\text{H}_5$ ,             | 3.24(dd), 3.46(m), 3.76(dd),                  |
|        |                             | $\text{CH}_2-\text{C}_6(1/2)$ ,                               | 3.90(dd), 4.64(d)                             |
|        |                             | $\text{CH}_2-\text{C}_6(1/2)$ , $\text{CH}$                   |                                               |
| 25     | $\alpha$ -Glucose           | $\text{H}_4$ , $\text{H}_2$ , $\text{H}_3, 5-\text{CH}$ ,     | 3.41(m), 3.53(dd), 3.71(m),                   |
|        |                             | $1/2$ $6-\text{CH}_2$ , $1-\text{CH}$                         | 3.83(m), 3.85(m), 5.23(d)                     |
| 26     | Glycine                     | $\text{CH}_2$                                                 | 3.56(s)                                       |

| Number | Metabolites                 | Assignment                                                               | $\delta$ $^1\text{H}$ (ppm) and multiplicity* |
|--------|-----------------------------|--------------------------------------------------------------------------|-----------------------------------------------|
| 27     | Threonine                   | $\alpha\text{CH}$                                                        | 3.57(d)                                       |
| 28     | Inositol                    | 4,6-CH                                                                   | 3.63(s)                                       |
| 29     | Glycerophosphocholine (GPC) | N-(CH <sub>3</sub> ) <sub>3</sub> , NCH <sub>2</sub> , P-CH <sub>2</sub> | 3.61(t), 3.91(m), 4.32(t)                     |
| 30     | 1-Methylhistidine           | $\alpha\text{CH}$ , $\beta\text{CH}_2(1/2)$ ,                            | 3.96(dd), 3.07(d), 3.13(d)                    |
|        |                             | $\beta\text{CH}_2(1/2)$                                                  |                                               |
| 31     |                             | N-CH <sub>3</sub> , CH <sub>2</sub>                                      | 3.03(s), 3.93(s)                              |
| 32     | Triglyceride                | (CH <sub>2</sub> ) <sub>n</sub>                                          | 4.05(m)                                       |
| 33     | Unsaturated Lipid           | CH=CH                                                                    | 5.29(m)                                       |
| 34     | Tyrosine                    | H2/H6, H3/H5,                                                            | 7.18(m), 6.88(d), 3.14(m),                    |
|        |                             | $\beta\text{CH}_2(1/2)$ , $\beta\text{CH}_2(1/2)$                        | 3.05(m)                                       |
| 35     | Histidine.                  | 2-CH, 4-CH                                                               | 7.02(s), 7.72(s)                              |

\* s: single; d: doublet; t: triplet; q: quartet; m: multiplet; dd: doublet of doublet

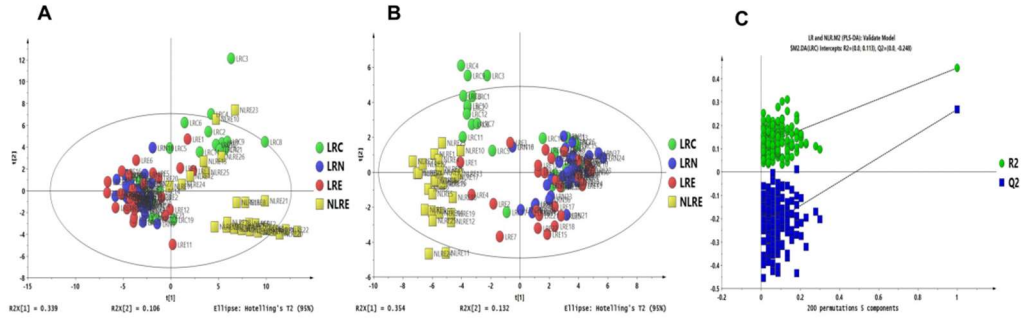

**Figure S1.** Multivariate analyses of ALL participants. Green circle: LRC, blue circle: LRN, red circle: LRC, and yellow square: NLRE. (A) Scores plot of the PCA model. (B) Score plot of the PLS-DA model. (C) The permutation test result for the PLS-DA model ( $R^2 = (0.0, 0.113)$ ,  $Q^2 = (0.0, -0.248)$ ).

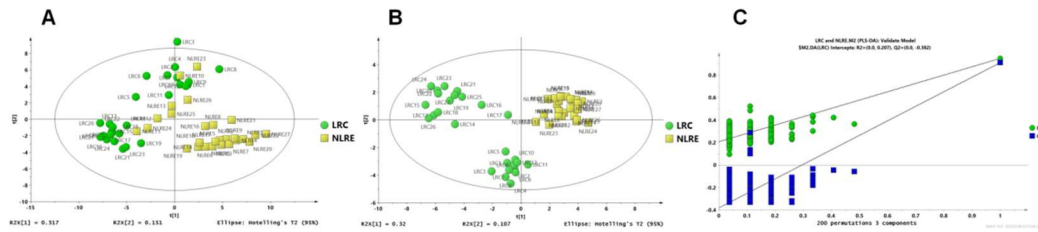

**Figure S2.** Multivariate analyses of LRC and NLRE. Green circle: LRC and yellow square: NLRE. (A) Scores plot of the PCA model. (B) Score plot of the PLS-DA model. (C) The permutation test result for the PLS-DA model ( $R^2 = (0.0, 0.207)$ ,  $Q^2 = (0.0, -0.382)$ ).

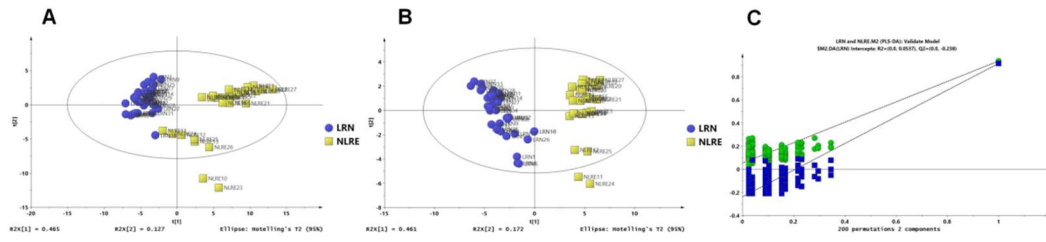

**Figure S3.** Multivariate analyses of LRN and NLRE. Blue circle: LRN and yellow square:NLRE. (A) Scores plot of the PCA model. (B) Score plot of the PLS-DA model. (C) The permutation test result for the PLS-DA model ( $R^2 = (0.0, 0.0537)$ ,  $Q^2 = (0.0, -0.238)$ ).

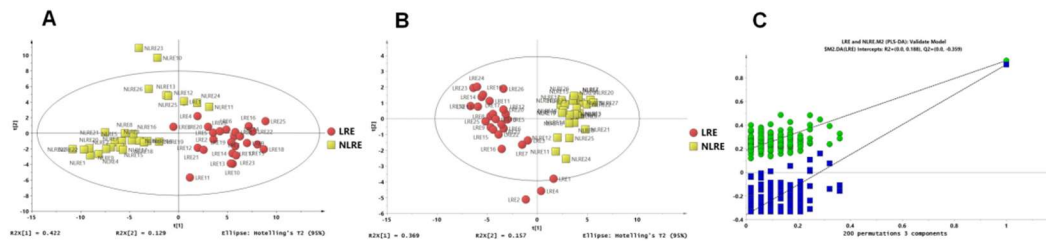

**Figure S4.** Multivariate analyses of LRN and NLRE. Blue circle: LRN and yellow square:NLRE. (A) Scores plot of the PCA model. (B) Score plot of the PLS-DA model. (C) The permutation test result for the PLS-DA model ( $R^2 = (0.0, 0.188)$ ,  $Q^2 = (0.0, -0.359)$ ).

| Metabolite Set                                      | Total | Hits | Expect | P value | Holm P | FDR   | Details              |
|-----------------------------------------------------|-------|------|--------|---------|--------|-------|----------------------|
| Glycolysis / Gluconeogenesis                        | 26    | 3    | 0.222  | 0.00113 | 0.095  | 0.095 | <a href="#">View</a> |
| Aminoacyl-tRNA biosynthesis                         | 48    | 3    | 0.41   | 0.00674 | 0.56   | 0.283 | <a href="#">View</a> |
| Alanine, aspartate and glutamate metabolism         | 28    | 2    | 0.239  | 0.0225  | 1.0    | 0.629 | <a href="#">View</a> |
| Phenylalanine, tyrosine and tryptophan biosynthesis | 4     | 1    | 0.0342 | 0.0338  | 1.0    | 0.709 | <a href="#">View</a> |
| Valine, leucine and isoleucine biosynthesis         | 8     | 1    | 0.0683 | 0.0665  | 1.0    | 0.989 | <a href="#">View</a> |
| Ubiquinone and other terpenoid-quinone biosynthesis | 9     | 1    | 0.0769 | 0.0745  | 1.0    | 0.989 | <a href="#">View</a> |
| Phenylalanine metabolism                            | 10    | 1    | 0.0854 | 0.0824  | 1.0    | 0.989 | <a href="#">View</a> |
| Glycerolipid metabolism                             | 16    | 1    | 0.137  | 0.129   | 1.0    | 1.0   | <a href="#">View</a> |
| Pantothenate and CoA biosynthesis                   | 19    | 1    | 0.162  | 0.151   | 1.0    | 1.0   | <a href="#">View</a> |
| Citrate cycle (TCA cycle)                           | 20    | 1    | 0.171  | 0.159   | 1.0    | 1.0   | <a href="#">View</a> |
| Fructose and mannose metabolism                     | 20    | 1    | 0.171  | 0.159   | 1.0    | 1.0   | <a href="#">View</a> |
| Selenocompound metabolism                           | 20    | 1    | 0.171  | 0.159   | 1.0    | 1.0   | <a href="#">View</a> |
| Pyruvate metabolism                                 | 22    | 1    | 0.188  | 0.173   | 1.0    | 1.0   | <a href="#">View</a> |
| Lysine degradation                                  | 25    | 1    | 0.214  | 0.194   | 1.0    | 1.0   | <a href="#">View</a> |
| Galactose metabolism                                | 27    | 1    | 0.231  | 0.208   | 1.0    | 1.0   | <a href="#">View</a> |
| Glyoxylate and dicarboxylate metabolism             | 32    | 1    | 0.273  | 0.242   | 1.0    | 1.0   | <a href="#">View</a> |
| Glycine, serine and threonine metabolism            | 33    | 1    | 0.282  | 0.249   | 1.0    | 1.0   | <a href="#">View</a> |
| Glycerophospholipid metabolism                      | 36    | 1    | 0.307  | 0.268   | 1.0    | 1.0   | <a href="#">View</a> |
| Amino sugar and nucleotide sugar metabolism         | 37    | 1    | 0.316  | 0.275   | 1.0    | 1.0   | <a href="#">View</a> |
| Fatty acid degradation                              | 39    | 1    | 0.333  | 0.287   | 1.0    | 1.0   | <a href="#">View</a> |
| Valine, leucine and isoleucine degradation          | 40    | 1    | 0.342  | 0.294   | 1.0    | 1.0   | <a href="#">View</a> |
| N-Glycan biosynthesis                               | 41    | 1    | 0.35   | 0.3     | 1.0    | 1.0   | <a href="#">View</a> |
| Tyrosine metabolism                                 | 42    | 1    | 0.359  | 0.306   | 1.0    | 1.0   | <a href="#">View</a> |

**Figure S5.** Metabolic Pathway enrichment of deregulated metabolites involved in  
LRC, LRN, LRE and NLRE

**Table S2.** Detailed information of all participants

| Number | Gender | Age(years) | BMI (kg/m <sup>2</sup> ) |
|--------|--------|------------|--------------------------|
| NLRE1  | female | 60         | 21.48                    |
| NLRE2  | male   | 61         | 24.84                    |
| NLRE3  | female | 61         | 22.48                    |
| NLRE4  | male   | 63         | 25.39                    |
| NLRE5  | female | 63         | 22.43                    |
| NLRE6  | male   | 64         | 25.74                    |
| NLRE7  | male   | 65         | 21.78                    |
| NLRE8  | female | 66         | 24.65                    |
| NLRE9  | male   | 66         | 21.09                    |
| NLRE10 | female | 69         | 25.97                    |
| NLRE11 | female | 70         | 20.73                    |
| NLRE12 | female | 70         | 20.07                    |
| NLRE13 | male   | 70         | 25.77                    |
| NLRE14 | male   | 71         | 25.62                    |
| NLRE15 | female | 71         | 25.15                    |
| NLRE16 | male   | 72         | 18.24                    |
| NLRE17 | male   | 72         | 22.96                    |
| NLRE18 | female | 73         | 26.27                    |
| NLRE19 | female | 74         | 19.91                    |
| NLRE20 | male   | 75         | 22.10                    |
| NLRE21 | male   | 78         | 24.01                    |
| NLRE22 | male   | 81         | 18.63                    |
| NLRE23 | male   | 81         | 33.18                    |
| NLRE24 | female | 82         | 26.27                    |
| NLRE25 | female | 83         | 21.55                    |
| NLRE26 | female | 83         | 23.73                    |
| NLRE27 | female | 86         | 17.15                    |
| LRE1   | male   | 60         | 18.59                    |
| LRE2   | male   | 61         | 18.36                    |
| LRE3   | male   | 62         | 24.74                    |
| LRE4   | male   | 62         | 27.18                    |
| LRE5   | male   | 63         | 17.27                    |
| LRE6   | male   | 63         | 23.34                    |
| LRE7   | female | 64         | 22.43                    |
| LRE8   | female | 64         | 22.03                    |
| LRE9   | female | 65         | 18.67                    |
| LRE10  | male   | 65         | 23.69                    |
| LRE11  | male   | 66         | 23.20                    |
| LRE12  | male   | 66         | 24.01                    |
| LRE13  | female | 67         | 18.11                    |

| Number | Gender | Age(years) | BMI (kg/m <sup>2</sup> ) |
|--------|--------|------------|--------------------------|
| LRE14  | male   | 68         | 20.32                    |
| LRE15  | male   | 68         | 25.06                    |
| LRE16  | male   | 69         | 27.04                    |
| LRE17  | male   | 70         | 27.48                    |
| LRE18  | male   | 71         | 24.58                    |
| LRE19  | male   | 73         | 29.04                    |
| LRE20  | male   | 75         | 29.00                    |
| LRE21  | female | 77         | 19.73                    |
| LRE22  | female | 79         | 24.12                    |
| LRE23  | female | 82         | 21.21                    |
| LRE24  | female | 84         | 15.36                    |
| LRE25  | female | 87         | 19.81                    |
| LRE26  | male   | 89         | 16.17                    |
| LRN1   | female | 90         | 12.42                    |
| LRN2   | male   | 91         | 20.08                    |
| LRN3   | female | 91         | 18.11                    |
| LRN4   | female | 91         | 22.58                    |
| LRN5   | female | 91         | 19.56                    |
| LRN6   | female | 91         | 19.17                    |
| LRN7   | female | 91         | 27.77                    |
| LRN8   | female | 91         | 21.39                    |
| LRN9   | female | 91         | 14.97                    |
| LRN10  | male   | 91         | 18.09                    |
| LRN11  | male   | 91         | 20.02                    |
| LRN12  | female | 92         | 14.74                    |
| LRN13  | female | 92         | 20.48                    |
| LRN14  | female | 92         | 19.50                    |
| LRN15  | female | 92         | 14.60                    |
| LRN16  | female | 92         | 18.69                    |
| LRN17  | female | 92         | 19.44                    |
| LRN18  | female | 92         | 20.41                    |
| LRN19  | female | 92         | 20.10                    |
| LRN20  | male   | 92         | 15.12                    |
| LRN21  | female | 93         | 18.07                    |
| LRN22  | female | 93         | 19.82                    |
| LRN23  | female | 93         | 17.33                    |
| LRN24  | female | 93         | 17.22                    |
| LRN25  | male   | 93         | 17.64                    |
| LRN26  | male   | 94         | 20.60                    |
| LRN27  | male   | 94         | 28.84                    |
| LRN28  | male   | 94         | 21.99                    |
| LRN29  | female | 95         | 18.38                    |

---

| Number | Gender | Age(years) | BMI (kg/m <sup>2</sup> ) |
|--------|--------|------------|--------------------------|
| LRN30  | female | 95         | 19.70                    |
| LRN31  | female | 95         | 22.74                    |
| LRN32  | female | 95         | 14.91                    |
| LRN33  | female | 96         | 19.94                    |
| LRN34  | female | 96         | 14.96                    |
| LRN35  | female | 98         | 17.58                    |
| LRN36  | female | 98         | 18.92                    |
| LRN37  | female | 98         | 17.36                    |
| LRC1   | male   | 100        | 12.42                    |
| LRC2   | female | 100        | 20.08                    |
| LRC3   | female | 100        | 18.11                    |
| LRC4   | male   | 100        | 22.58                    |
| LRC5   | female | 100        | 19.56                    |
| LRC6   | female | 101        | 19.17                    |
| LRC7   | female | 101        | 27.77                    |
| LRC8   | female | 101        | 21.39                    |
| LRC9   | male   | 101        | 14.97                    |
| LRC10  | female | 101        | 18.09                    |
| LRC11  | female | 101        | 20.02                    |
| LRC12  | female | 102        | 14.74                    |
| LRC13  | female | 102        | 20.48                    |
| LRC14  | female | 102        | 19.50                    |
| LRC15  | female | 102        | 14.60                    |
| LRC16  | female | 102        | 18.69                    |
| LRC17  | female | 102        | 19.44                    |
| LRC18  | female | 102        | 20.41                    |
| LRC19  | female | 104        | 20.10                    |
| LRC20  | female | 104        | 15.12                    |
| LRC21  | female | 106        | 18.07                    |
| LRC22  | female | 106        | 19.82                    |
| LRC23  | female | 107        | 17.33                    |
| LRC24  | female | 108        | 17.22                    |
| LRC25  | female | 108        | 17.64                    |
| LRC26  | female | 111        | 20.60                    |
| LRC27  | female | 118        | 28.84                    |

---
